# Supplementary material for: The Analysis of Patterns of Two COVID-19 Outbreak Clusters in China
Source: MDPI journal article supplement (doi:10.3390/ijerph19084876), 2022-04-17
Supplement: s1 [file s1]

### Text S1. The standard deviation ellipse (SDE) method

The calculation method is mainly divided into three steps: 1. Determine the center of the circle. 2. Determine the rotation angle. 3. Determine the length of the major and minor axes of the ellipse. The specific formula is as follows:

$$SDE_x = \sqrt{\frac{\sum_{i=1}^n (x_i - \bar{x})^2}{n}}, SDE_y = \sqrt{\frac{\sum_{i=1}^n (y_i - \bar{y})^2}{n}}$$

where  $(x_i, y_i)$  are the coordinates of the place of residence of a confirmed infected individual (called a confirmed case),  $(\bar{x}, \bar{y})$  represents the mean center of a case, and  $n$  is equal to the number of confirmed cases.

The angle of rotation is calculated as follows:

$$\tan \theta = \frac{A + B}{C}$$

$$A = (\sum_{i=1}^n \tilde{x}_i^2 - \sum_{i=1}^n \tilde{y}_i^2), B = \sqrt{(\sum_{i=1}^n \tilde{x}_i^2 - \sum_{i=1}^n \tilde{y}_i^2)^2 + 4(\sum_{i=1}^n \tilde{x}_i \tilde{y}_i)^2}, C = 2\sum_{i=1}^n \tilde{x}_i \tilde{y}_i$$

where  $\tilde{x}_i$  and  $\tilde{y}_i$  are the deviations of  $(x, y)$  from  $(\bar{x}, \bar{y})$ .

The standard deviations for the x-axis and y-axis are as follows:

$$\sigma_x = \sqrt{2} \sqrt{\frac{\sum_{i=1}^n (\tilde{x}_i \cos \theta - \tilde{y}_i \sin \theta)^2}{n}}$$
$$\sigma_y = \sqrt{2} \sqrt{\frac{\sum_{i=1}^n (\tilde{x}_i \sin \theta + \tilde{y}_i \cos \theta)^2}{n}}$$

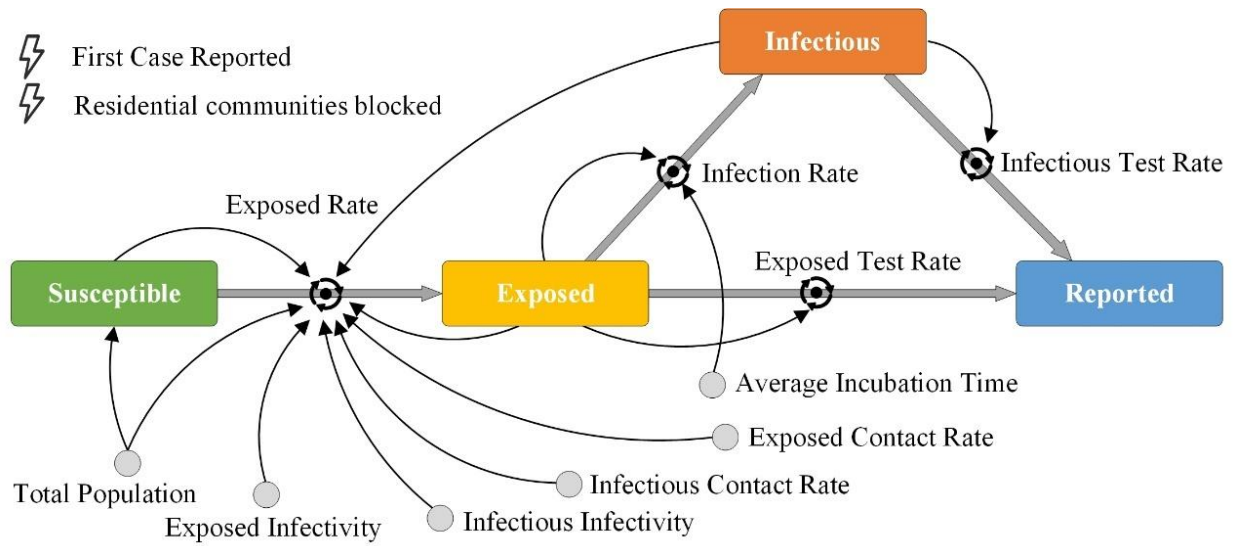

**Figure S1.** Improved SEIR model: *Susceptible* indicates people who have not been infected with the virus; *Exposed* indicates that the person infected with the virus has no symptoms but has a certain level of infection; *Infectious* means a person has symptoms of infection and can infect others; and *Reported* indicates a confirmed case. *Total population* refers to the total population of the study area; *Exposed rate* indicates the flow of susceptible people into exposed areas; *Exposed infection* refers to the probability that an exposed person is in contact with an easily infected person; *Infectious infectivity* refers to the probability that an infectious person contacts a susceptible person and the susceptible person is infected; *Exposed contact rate* indicates the average daily contact rate between an exposed individual and others; *Infectious contact rate* indicates the average daily contact rate between infectious individuals and others; *Average incubation time* indicates the number of days that the infection incubation period will last after a susceptible person is infected; *Infection rate* indicates the number of people exposed to the number of people infected; *Exposed test rate* the number of exposed individuals that tested positive; *Infection test rate* indicates the number of infected individuals confirmed through testing; ⚡ *First case reported* refers to the first confirmed event; and ⚡ *Residential communities*

*blocked* indicates where the outbreak center was closed. The contact rate and detection rate will change after two events.

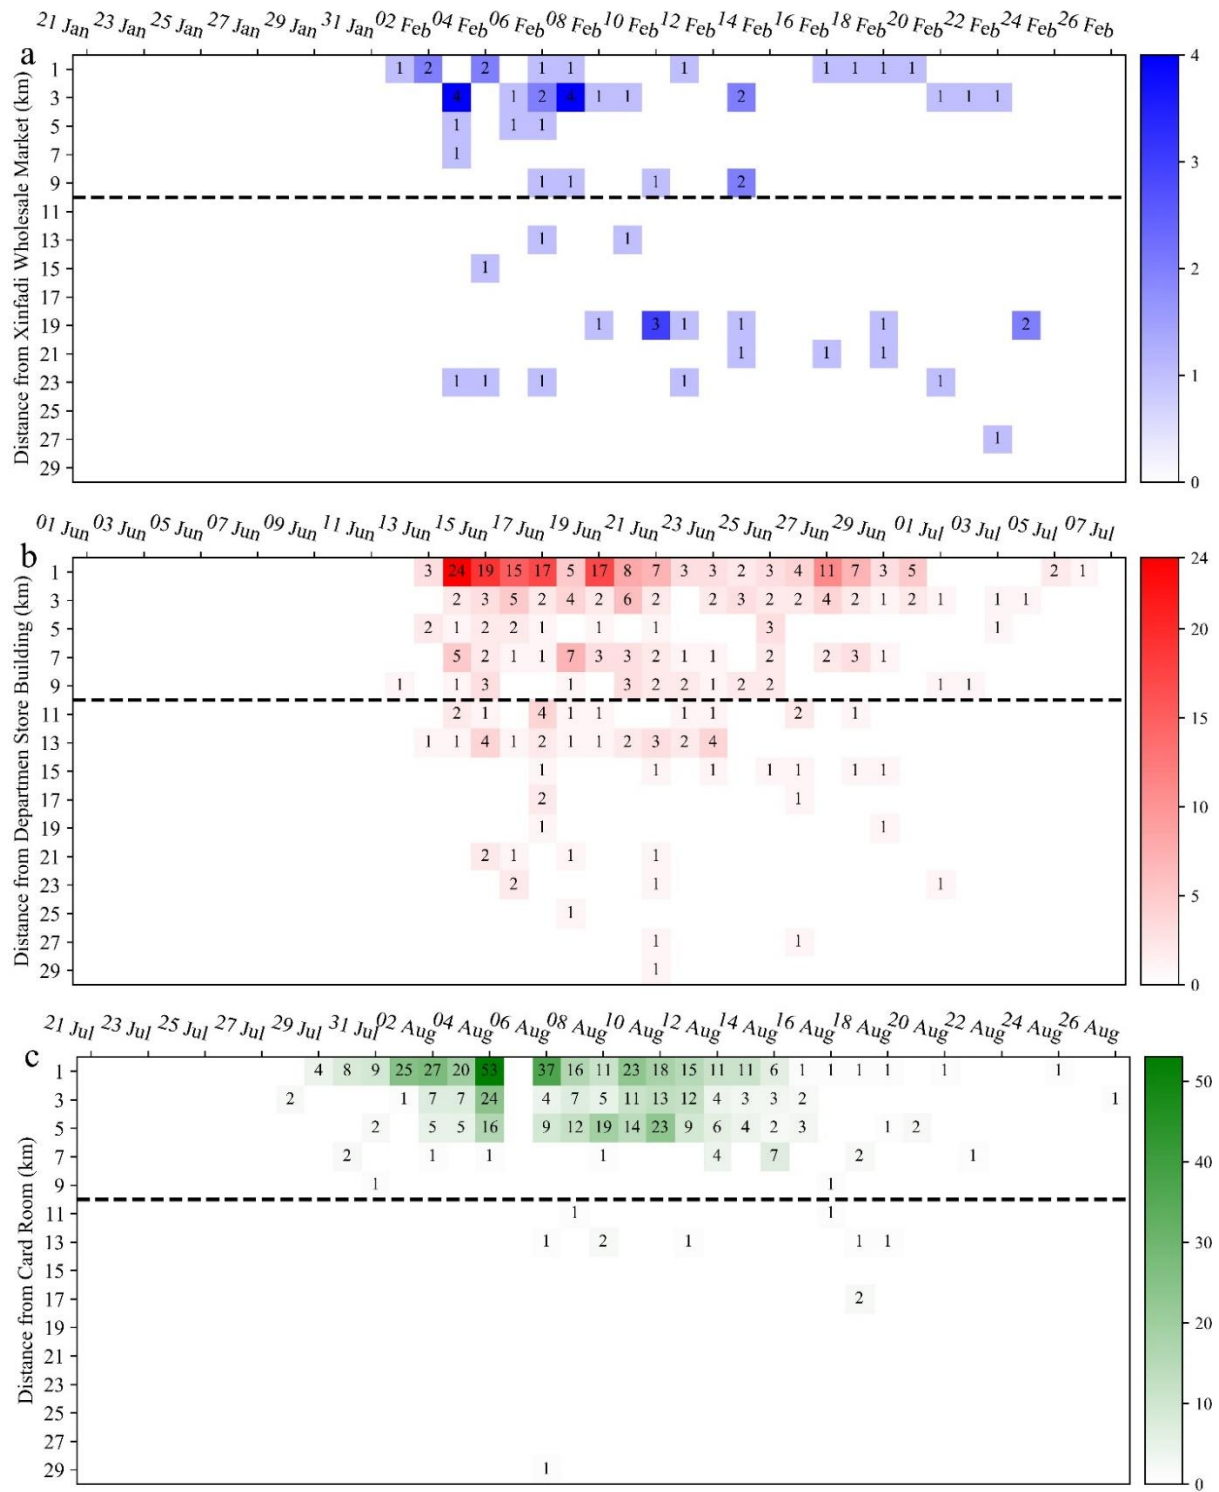

**Figure S2.** Distribution of infected persons at different distances from each epidemic center: (a) DSB; (b) XFD; and (c) Yangzhou, China.

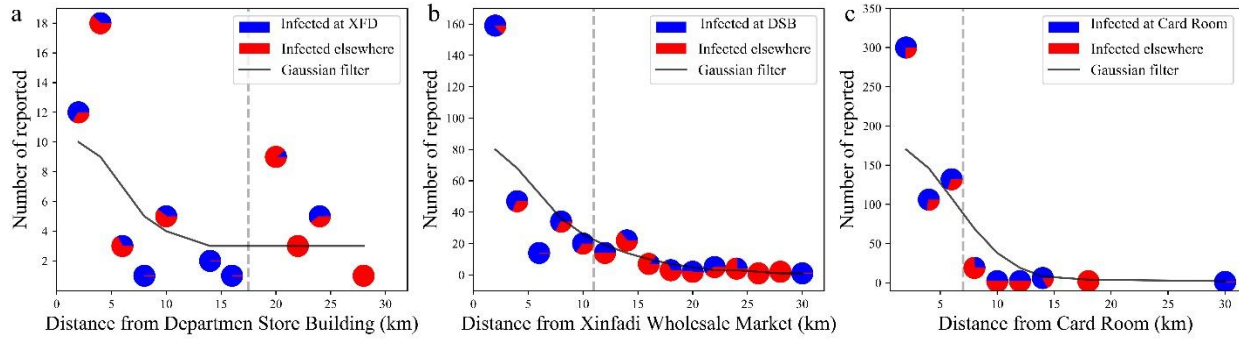

**Figure S3.** Relationship between distance and cumulative number of confirmed patients. (a) DSB; (b) XFD; (c) and Yangzhou, China. In the distance range on the left side of the dotted line, most pie charts are blue, indicating that the infected persons in these closed areas had a history of travel to and from the outbreak epicenter and were initially infected there. In contrast, the areas on the right side of the dotted line indicate secondary transmissions.

**Table S1.** SDE parameters.

|     | Time (5-day<br>interval) | Mean center of the<br>ellipse | Major axis  | Minor axis  | Angle of rotation (°) |
|-----|--------------------------|-------------------------------|-------------|-------------|-----------------------|
| DSB | 1                        | 117.339685, 39.71346          | 14410.97031 | 7983.848072 | 95.660481             |
|     | 2                        | 117.343448, 39.698568         | 15881.69875 | 8862.051235 | 118.180586            |
|     | 3                        | 117.355738, 39.695046         | 17151.44528 | 8286.043083 | 114.487726            |
|     | 4                        | 117.364755, 39.694042         | 17654.07863 | 7832.475908 | 113.225958            |
|     | 5                        | 117.371308, 39.691293         | 18248.09318 | 7579.023963 | 114.158147            |
| XFD | 1                        | 116.327475, 39.820445         | 10012.19084 | 7440.223231 | 158.26746             |
|     | 2                        | 116.332955, 39.820063         | 11872.18671 | 8013.049218 | 153.090592            |
|     | 3                        | 116.330333, 39.822501         | 12552.15259 | 7743.995365 | 153.657724            |
|     | 4                        | 116.330474, 39.81981          | 12292.68242 | 7493.913747 | 152.770441            |
|     | 5                        | 116.330254, 39.819936         | 12188.9407  | 7438.226395 | 152.65551             |
